# Supplementary material
Source: Springer Nature journal article supplement (https://www.springermedizin.de/resource/supplementary/12884_2011_502_MOESM1_ESM.pdf/9457916)
Supplement: MOESM1 [file 9457916]

The 4 post-natal community Star Buddies approached all women who had been receiving incentives for at least 4 weeks

35 women agreed to participate  
(6 – 11 names provided by each Star Buddy)

26 participated in an in-depth interview  
(5-8 from each Star Buddy)

9 women were uncontactable after 4 contact attempts
